# Supplementary material
Source: publisher figshare collection journal article supplement (https://brill.figshare.com/articles/dataset/_/21437298)
Supplement: Supplementary file 1 [file 1]

**Assessment of the phylogenetic relationships within the  
spondylidine branch of Spondylidinae (Coleoptera,  
Cerambycidae)**

**Havva Kübra Soydaş-Ayoub<sup>a,\*</sup>, Fevzi Uçkan<sup>a</sup>, Şener Atak<sup>b</sup>, Burcu Şabanoğlu  
Şimşek<sup>c</sup> and Osman İbiş<sup>d</sup>**

<sup>a</sup>Department of Biology, Kocaeli University Graduate School of Natural and Applied  
Sciences, 41100 Kocaeli, Turkey

<sup>b</sup>Kocaeli Directorate of Provincial Agriculture and Forestry, 41140 Kocaeli, Turkey

<sup>c</sup>Department of Biology, Faculty of Science, Applied Biology Section, Hacettepe  
University, 06800 Ankara, Turkey

<sup>d</sup>Genome and Stem Cell Center (GENKOK), Erciyes University, 38280 Kayseri, Turkey

\*Corresponding author; e-mail: havvasoydabas@gmail.com

ORCID iD: Soydaş-Ayoub: 0000-0002-5215-6117

**Supplementary material**

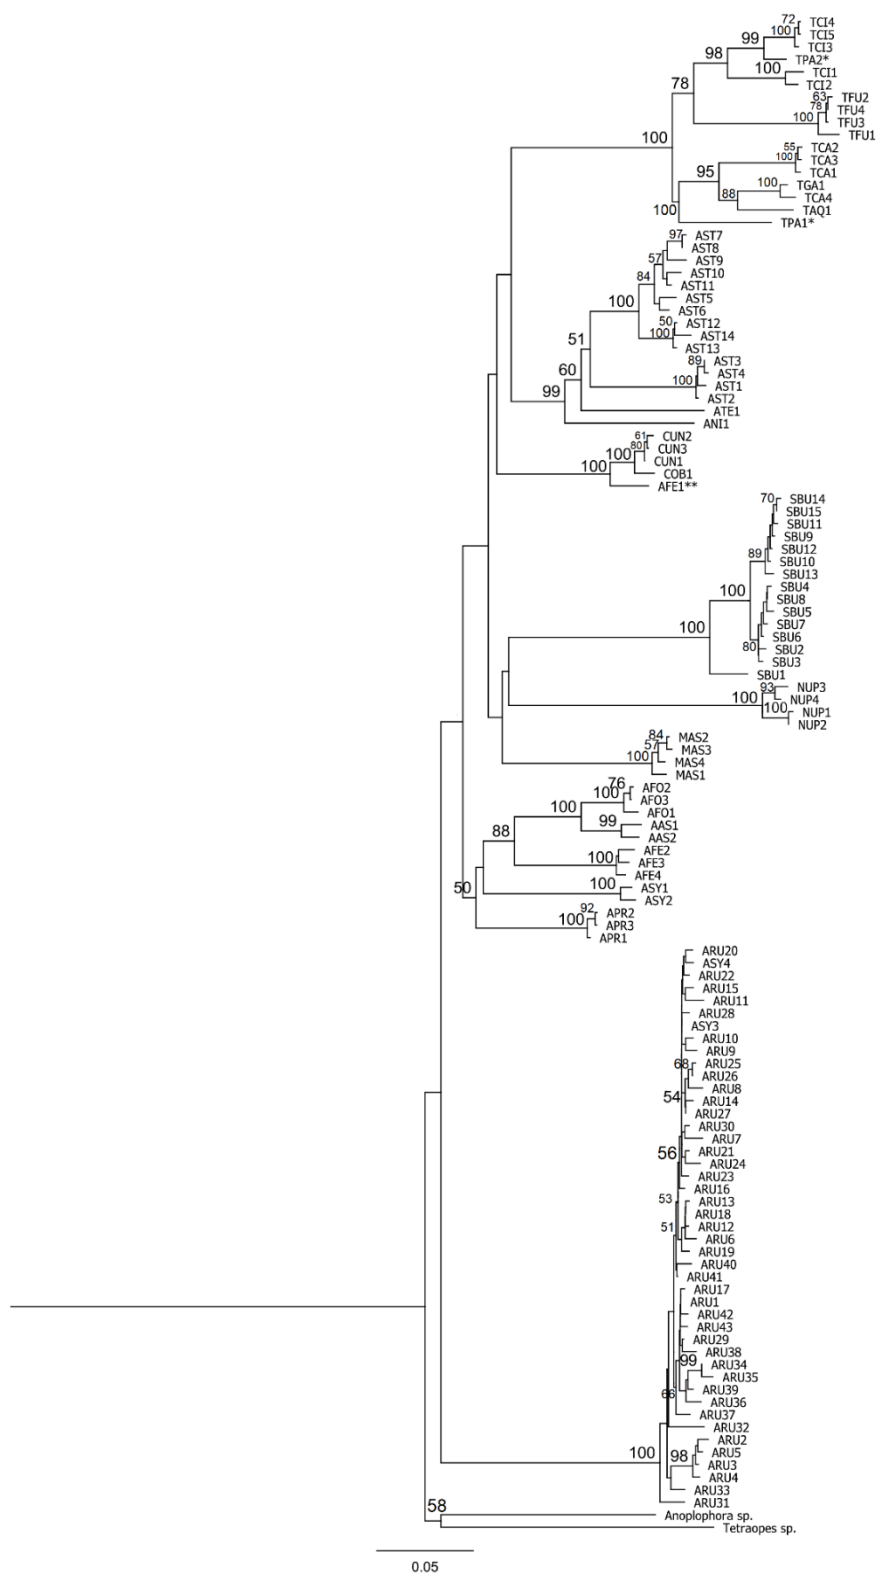

**Fig. S1.** Maximum Likelihood (ML) phylogenetic tree based on *COI* haplotypes (658 bp).

Bootstrap supports equal to or higher than 50% were shown on the nodes.

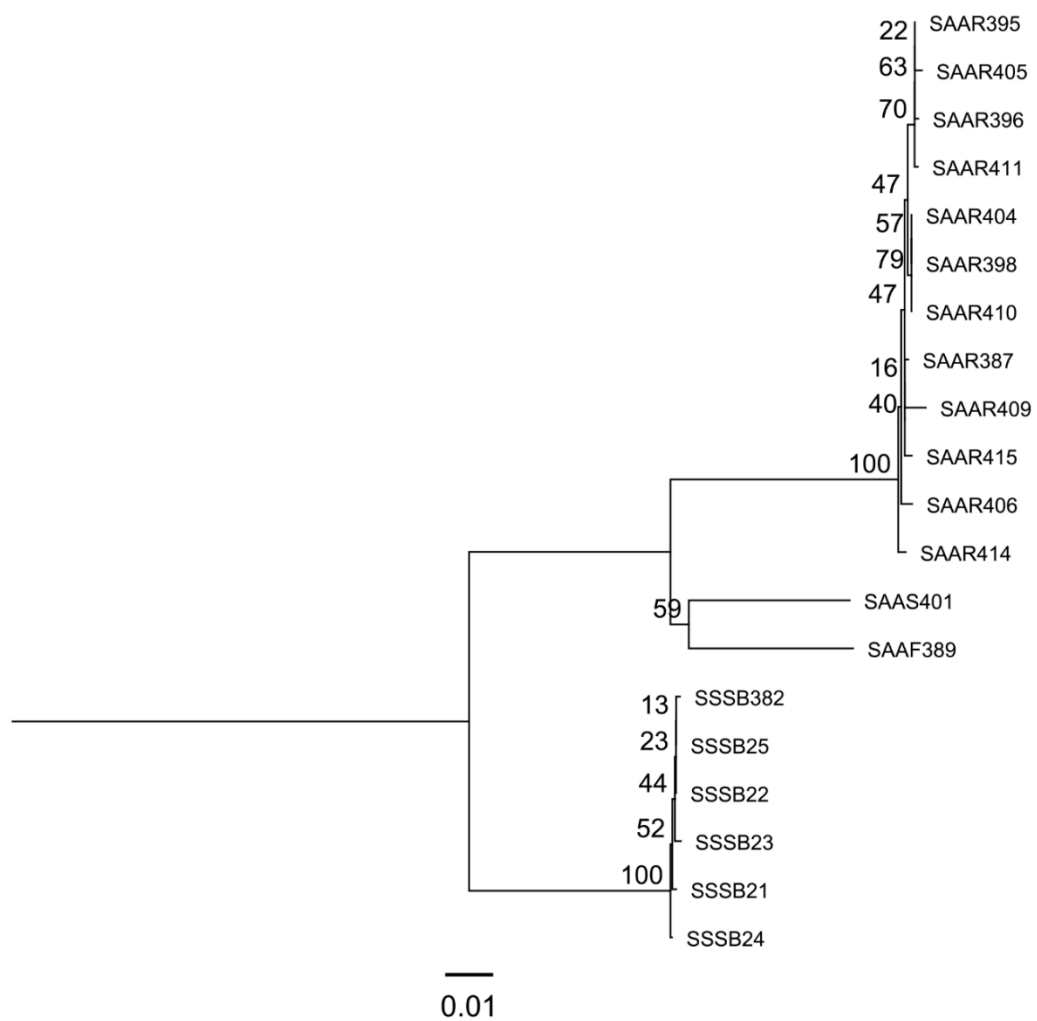

**Fig. S2.** Maximum Likelihood (ML) phylogenetic tree based on the binary combination of COI+28S rRNA D1-D2 gene regions. Bootstrap supports were shown on the nodes.

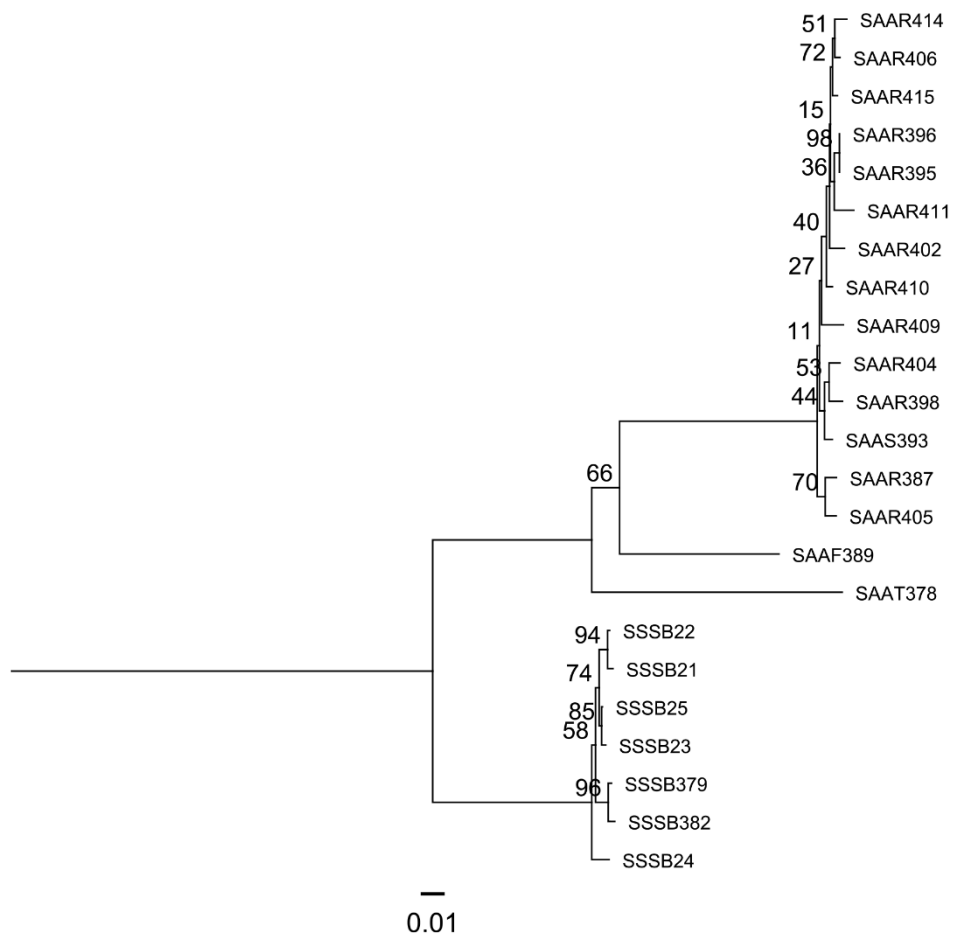

**Fig. S3.** Maximum Likelihood (ML) phylogenetic tree based on the binary combination of *COI*+*16S rRNA* gene regions. Bootstrap supports were shown on the nodes.
