# Supplementary material
Source: publisher figshare collection journal article supplement (https://brill.figshare.com/articles/dataset/_/21437298)
Supplement: Supplementary file 1 [file 1]

## Sheet: MatrixOutput
	TFU1	TFU3	TFU2	TFU4	TCI1	TCI2	TPA2*	TCI3	TCI4	TCI5	TPA1*	TCA1	TCA2	TCA3	TAQ1	TGA1	TCA4	NUP1	NUP2	NUP3	NUP4	SBU1	SBU9	SBU10	SBU11	SBU12	SBU13	SBU14	SBU15	SBU7	SBU6	SBU5	SBU2	SBU4	SBU3	SBU8	ANI1	ATE1	AST1	AST2	AST3	AST4	AST12	AST13	AST14	AST5	AST6	AST7	AST8
TFU1
TFU3	0.0136778
TFU2	0.0106383	0.00303951
TFU4	0.0121581	0.00151976	0.00151976
TCI1	0.0987842	0.0942249	0.0942249	0.0927052
TCI2	0.0987842	0.0942249	0.0942249	0.0927052	0.0121581
TPA2*	0.0927052	0.0881459	0.0881459	0.0866261	0.050152	0.0471125
TCI3	0.0911854	0.0835866	0.0835866	0.0820669	0.0607903	0.0607903	0.0227964
TCI4	0.0957447	0.0881459	0.0881459	0.0866261	0.06231	0.06231	0.0243161	0.00455927
TCI5	0.0942249	0.0866261	0.0866261	0.0851064	0.0607903	0.0607903	0.0227964	0.00303951	0.00151976
TPA1*	0.107903	0.0987842	0.0987842	0.0972644	0.0911854	0.0881459	0.0775076	0.0820669	0.0835866	0.0820669
TCA1	0.113982	0.106383	0.106383	0.104863	0.0911854	0.0851064	0.0759878	0.0866261	0.0881459	0.0866261	0.0744681
TCA2	0.110942	0.103343	0.103343	0.101824	0.0942249	0.0881459	0.0790274	0.0881459	0.0896657	0.0881459	0.0775076	0.00607903
TCA3	0.113982	0.106383	0.106383	0.104863	0.0911854	0.0851064	0.0759878	0.0881459	0.0896657	0.0881459	0.0744681	0.00303951	0.00303951
TAQ1	0.12462	0.118541	0.118541	0.117021	0.0942249	0.0881459	0.0927052	0.0957447	0.0972644	0.0957447	0.0759878	0.0638298	0.0638298	0.0638298
TGA1	0.115502	0.110942	0.110942	0.109422	0.0972644	0.0942249	0.0911854	0.0911854	0.0927052	0.0911854	0.0866261	0.056231	0.0531915	0.056231	0.0425532
TCA4	0.113982	0.107903	0.107903	0.106383	0.0987842	0.0927052	0.0927052	0.0896657	0.0942249	0.0927052	0.0881459	0.0607903	0.0577508	0.0607903	0.0425532	0.00911854
NUP1	0.202128	0.202128	0.202128	0.200608	0.191489	0.18997	0.203647	0.206687	0.206687	0.206687	0.208207	0.220365	0.215805	0.218845	0.212766	0.202128	0.208207
NUP2	0.200608	0.200608	0.200608	0.199088	0.191489	0.18997	0.203647	0.206687	0.206687	0.206687	0.206687	0.218845	0.214286	0.217325	0.211246	0.200608	0.206687	0.00151976
NUP3	0.196049	0.197568	0.197568	0.196049	0.196049	0.194529	0.203647	0.203647	0.206687	0.206687	0.208207	0.218845	0.214286	0.217325	0.217325	0.205167	0.206687	0.0212766	0.0197568
NUP4	0.196049	0.197568	0.197568	0.196049	0.196049	0.194529	0.203647	0.203647	0.206687	0.206687	0.206687	0.218845	0.214286	0.217325	0.215805	0.203647	0.205167	0.0197568	0.0182371	0.00759878
SBU1	0.197568	0.18845	0.191489	0.18997	0.18845	0.18693	0.193009	0.193009	0.18997	0.191489	0.18541	0.18693	0.180851	0.183891	0.193009	0.183891	0.18541	0.182371	0.180851	0.183891	0.182371
SBU9	0.215805	0.209726	0.209726	0.208207	0.18693	0.18541	0.18997	0.196049	0.193009	0.194529	0.193009	0.18845	0.18541	0.18541	0.199088	0.193009	0.197568	0.191489	0.18997	0.196049	0.194529	0.0395137
SBU10	0.214286	0.208207	0.208207	0.206687	0.18541	0.183891	0.18845	0.194529	0.191489	0.193009	0.191489	0.18693	0.183891	0.183891	0.197568	0.191489	0.196049	0.18997	0.18845	0.194529	0.193009	0.0364742	0.00303951
SBU11	0.215805	0.209726	0.209726	0.208207	0.18693	0.18541	0.18997	0.196049	0.193009	0.194529	0.193009	0.18845	0.18541	0.18541	0.199088	0.193009	0.197568	0.191489	0.18997	0.196049	0.194529	0.0395137	0.00303951	0.00303951
SBU12	0.214286	0.208207	0.208207	0.206687	0.18845	0.18693	0.18845	0.194529	0.191489	0.193009	0.191489	0.18693	0.183891	0.183891	0.197568	0.191489	0.196049	0.193009	0.191489	0.197568	0.196049	0.0364742	0.00303951	0.00303951	0.00303951
SBU13	0.215805	0.209726	0.209726	0.208207	0.18693	0.18541	0.191489	0.197568	0.194529	0.196049	0.191489	0.18997	0.18693	0.18693	0.197568	0.194529	0.199088	0.18693	0.18541	0.191489	0.18997	0.0425532	0.00607903	0.00607903	0.00607903	0.00607903
SBU14	0.214286	0.208207	0.208207	0.206687	0.18541	0.183891	0.18997	0.196049	0.193009	0.194529	0.18997	0.18845	0.18541	0.18541	0.196049	0.193009	0.197568	0.18845	0.18693	0.193009	0.191489	0.0410334	0.00455927	0.00455927	0.00455927	0.00455927	0.00455927
SBU15	0.215805	0.209726	0.209726	0.208207	0.18693	0.18541	0.191489	0.197568	0.194529	0.196049	0.191489	0.18997	0.18693	0.18693	0.197568	0.194529	0.199088	0.18997	0.18845	0.194529	0.193009	0.0395137	0.00303951	0.00303951	0.00303951	0.00303951	0.00303951	0.00151976
SBU7	0.212766	0.206687	0.206687	0.205167	0.18845	0.18693	0.18541	0.194529	0.191489	0.193009	0.191489	0.183891	0.180851	0.180851	0.194529	0.18845	0.196049	0.18845	0.18693	0.193009	0.191489	0.0364742	0.0121581	0.0121581	0.0121581	0.0121581	0.0151976	0.0136778	0.0121581
SBU6	0.212766	0.206687	0.206687	0.205167	0.18845	0.18693	0.18845	0.194529	0.191489	0.193009	0.18997	0.183891	0.180851	0.180851	0.193009	0.18693	0.194529	0.18845	0.18693	0.193009	0.18845	0.0364742	0.0121581	0.0121581	0.0121581	0.0121581	0.0151976	0.0136778	0.0121581	0.00303951
SBU5	0.212766	0.206687	0.206687	0.205167	0.191489	0.18693	0.191489	0.197568	0.194529	0.196049	0.191489	0.183891	0.180851	0.180851	0.197568	0.18845	0.196049	0.18997	0.18845	0.194529	0.193009	0.0395137	0.0151976	0.0151976	0.0151976	0.0151976	0.0182371	0.0167173	0.0151976	0.00607903	0.00607903
SBU2	0.209726	0.203647	0.203647	0.202128	0.18541	0.180851	0.18541	0.191489	0.18845	0.18997	0.18845	0.180851	0.177812	0.177812	0.191489	0.18541	0.193009	0.18541	0.183891	0.18997	0.18845	0.0364742	0.0151976	0.0151976	0.0151976	0.0151976	0.0182371	0.0167173	0.0151976	0.00607903	0.00607903	0.00607903
SBU4	0.211246	0.205167	0.205167	0.203647	0.18693	0.182371	0.18693	0.193009	0.18997	0.191489	0.18997	0.182371	0.179331	0.179331	0.193009	0.18693	0.194529	0.18693	0.18541	0.191489	0.18997	0.0379939	0.0136778	0.0136778	0.0136778	0.0136778	0.0167173	0.0121581	0.0136778	0.00455927	0.00455927	0.00455927	0.00455927
SBU3	0.211246	0.205167	0.205167	0.203647	0.18693	0.182371	0.18693	0.193009	0.18997	0.191489	0.18997	0.182371	0.179331	0.179331	0.193009	0.18693	0.194529	0.18693	0.18541	0.191489	0.18997	0.0379939	0.0136778	0.0136778	0.0136778	0.0136778	0.0167173	0.0151976	0.0136778	0.00455927	0.00455927	0.00455927	0.00455927	0.00303951
SBU8	0.212766	0.206687	0.206687	0.205167	0.18845	0.183891	0.18845	0.194529	0.191489	0.193009	0.191489	0.183891	0.180851	0.180851	0.194529	0.18845	0.196049	0.18845	0.18693	0.193009	0.191489	0.0364742	0.0121581	0.0121581	0.0121581	0.0121581	0.0151976	0.0136778	0.0121581	0.00303951	0.00303951	0.00303951	0.00303951	0.00151976	0.00151976
ANI1	0.183891	0.182371	0.18541	0.183891	0.168693	0.167173	0.170213	0.176292	0.173252	0.173252	0.155015	0.171733	0.171733	0.168693	0.174772	0.167173	0.170213	0.180851	0.179331	0.174772	0.171733	0.165653	0.177812	0.176292	0.177812	0.176292	0.176292	0.177812	0.176292	0.176292	0.176292	0.179331	0.176292	0.177812	0.174772	0.176292
ATE1	0.18997	0.18693	0.18693	0.18541	0.173252	0.174772	0.174772	0.182371	0.182371	0.182371	0.165653	0.179331	0.179331	0.179331	0.171733	0.171733	0.176292	0.170213	0.168693	0.176292	0.170213	0.174772	0.179331	0.177812	0.179331	0.177812	0.177812	0.179331	0.177812	0.174772	0.173252	0.176292	0.176292	0.177812	0.174772	0.176292	0.0957447
AST1	0.183891	0.180851	0.183891	0.182371	0.158055	0.161094	0.164134	0.161094	0.161094	0.161094	0.162614	0.174772	0.173252	0.176292	0.170213	0.165653	0.170213	0.171733	0.170213	0.174772	0.173252	0.164134	0.171733	0.170213	0.171733	0.173252	0.173252	0.174772	0.173252	0.171733	0.171733	0.174772	0.174772	0.173252	0.170213	0.171733	0.0987842	0.0896657
AST2	0.18693	0.183891	0.18693	0.18541	0.158055	0.161094	0.164134	0.161094	0.161094	0.161094	0.162614	0.174772	0.176292	0.176292	0.170213	0.168693	0.173252	0.171733	0.170213	0.174772	0.173252	0.164134	0.168693	0.167173	0.168693	0.170213	0.170213	0.171733	0.170213	0.168693	0.168693	0.171733	0.171733	0.170213	0.167173	0.168693	0.0972644	0.0866261	0.00607903
AST3	0.18693	0.183891	0.18693	0.18541	0.158055	0.161094	0.164134	0.161094	0.161094	0.161094	0.162614	0.174772	0.176292	0.176292	0.170213	0.168693	0.173252	0.171733	0.170213	0.174772	0.173252	0.165653	0.170213	0.168693	0.170213	0.171733	0.171733	0.173252	0.171733	0.170213	0.170213	0.173252	0.173252	0.171733	0.168693	0.170213	0.0972644	0.0896657	0.00607903	0.00303951
AST4	0.18693	0.183891	0.18693	0.18541	0.159574	0.162614	0.164134	0.161094	0.161094	0.161094	0.162614	0.174772	0.176292	0.176292	0.170213	0.168693	0.173252	0.173252	0.171733	0.173252	0.171733	0.165653	0.170213	0.168693	0.170213	0.171733	0.171733	0.173252	0.171733	0.170213	0.170213	0.173252	0.173252	0.171733	0.168693	0.170213	0.0972644	0.0911854	0.00759878	0.00455927	0.00151976
AST12	0.176292	0.170213	0.171733	0.170213	0.158055	0.156535	0.156535	0.164134	0.164134	0.164134	0.147416	0.155015	0.159574	0.156535	0.158055	0.158055	0.161094	0.165653	0.164134	0.170213	0.167173	0.162614	0.171733	0.170213	0.173252	0.170213	0.170213	0.171733	0.170213	0.170213	0.170213	0.173252	0.170213	0.171733	0.168693	0.170213	0.0957447	0.0835866	0.0759878	0.0790274	0.0790274	0.0805471
AST13	0.179331	0.173252	0.174772	0.173252	0.158055	0.156535	0.156535	0.164134	0.164134	0.164134	0.144377	0.155015	0.159574	0.156535	0.155015	0.159574	0.162614	0.168693	0.167173	0.173252	0.170213	0.164134	0.173252	0.171733	0.174772	0.171733	0.171733	0.173252	0.171733	0.171733	0.171733	0.174772	0.171733	0.173252	0.170213	0.171733	0.0957447	0.0835866	0.0729483	0.0759878	0.0759878	0.0775076	0.00303951
AST14	0.179331	0.173252	0.174772	0.173252	0.159574	0.158055	0.158055	0.162614	0.162614	0.162614	0.150456	0.158055	0.162614	0.159574	0.159574	0.159574	0.162614	0.168693	0.167173	0.173252	0.170213	0.167173	0.174772	0.173252	0.176292	0.173252	0.173252	0.174772	0.173252	0.173252	0.173252	0.176292	0.173252	0.174772	0.171733	0.173252	0.0987842	0.0881459	0.0805471	0.0835866	0.0835866	0.0851064	0.00759878	0.00759878
AST5	0.174772	0.171733	0.173252	0.171733	0.159574	0.161094	0.159574	0.170213	0.170213	0.170213	0.151976	0.151976	0.156535	0.153495	0.161094	0.156535	0.162614	0.173252	0.171733	0.174772	0.171733	0.167173	0.179331	0.177812	0.179331	0.177812	0.177812	0.179331	0.177812	0.177812	0.177812	0.177812	0.177812	0.179331	0.176292	0.177812	0.0987842	0.0835866	0.0744681	0.0714286	0.0714286	0.0729483	0.0288754	0.0288754	0.0334347
AST6	0.180851	0.177812	0.179331	0.177812	0.162614	0.164134	0.161094	0.171733	0.171733	0.171733	0.159574	0.156535	0.161094	0.158055	0.162614	0.158055	0.164134	0.179331	0.177812	0.177812	0.174772	0.165653	0.180851	0.179331	0.180851	0.179331	0.182371	0.183891	0.182371	0.179331	0.179331	0.182371	0.179331	0.180851	0.177812	0.179331	0.100304	0.0866261	0.0744681	0.0714286	0.0714286	0.0729483	0.0334347	0.0334347	0.0379939	0.0106383
AST7	0.180851	0.177812	0.179331	0.177812	0.164134	0.162614	0.159574	0.173252	0.173252	0.173252	0.158055	0.156535	0.161094	0.158055	0.164134	0.159574	0.165653	0.179331	0.177812	0.177812	0.174772	0.167173	0.177812	0.176292	0.177812	0.176292	0.179331	0.180851	0.179331	0.176292	0.176292	0.179331	0.176292	0.177812	0.174772	0.176292	0.0972644	0.0927052	0.0790274	0.0759878	0.0759878	0.0775076	0.0334347	0.0334347	0.0349544	0.0167173	0.0151976
AST8	0.182371	0.179331	0.180851	0.179331	0.162614	0.161094	0.158055	0.171733	0.171733	0.171733	0.156535	0.155015	0.159574	0.156535	0.162614	0.158055	0.164134	0.180851	0.179331	0.179331	0.176292	0.165653	0.176292	0.174772	0.176292	0.174772	0.177812	0.179331	0.177812	0.174772	0.174772	0.177812	0.174772	0.176292	0.173252	0.174772	0.0957447	0.0911854	0.0775076	0.0744681	0.0744681	0.0759878	0.0319149	0.0319149	0.0334347	0.0151976	0.0136778	0.00151976
AST9	0.177812	0.174772	0.176292	0.174772	0.164134	0.162614	0.161094	0.174772	0.174772	0.174772	0.155015	0.158055	0.159574	0.159574	0.164134	0.158055	0.164134	0.177812	0.176292	0.176292	0.173252	0.168693	0.183891	0.182371	0.183891	0.182371	0.182371	0.183891	0.182371	0.182371	0.182371	0.18541	0.182371	0.183891	0.180851	0.182371	0.0972644	0.0942249	0.0744681	0.0775076	0.0775076	0.0790274	0.0273556	0.0273556	0.0319149	0.0167173	0.0212766	0.0151976	0.0136778
AST10	0.177812	0.171733	0.173252	0.171733	0.159574	0.158055	0.156535	0.170213	0.170213	0.170213	0.150456	0.155015	0.159574	0.156535	0.159574	0.159574	0.165653	0.174772	0.173252	0.176292	0.173252	0.165653	0.177812	0.176292	0.177812	0.176292	0.176292	0.177812	0.176292	0.176292	0.176292	0.179331	0.176292	0.177812	0.174772	0.176292	0.0927052	0.0866261	0.0790274	0.0790274	0.0790274	0.0805471	0.0227964	0.0227964	0.0273556	0.0182371	0.0167173	0.0136778	0.0151976
AST11	0.176292	0.173252	0.174772	0.173252	0.159574	0.158055	0.156535	0.170213	0.170213	0.170213	0.150456	0.153495	0.158055	0.155015	0.161094	0.158055	0.164134	0.174772	0.173252	0.173252	0.170213	0.165653	0.177812	0.176292	0.177812	0.176292	0.176292	0.177812	0.176292	0.176292	0.176292	0.179331	0.176292	0.177812	0.174772	0.176292	0.0942249	0.0881459	0.0775076	0.0744681	0.0744681	0.0759878	0.0243161	0.0243161	0.0288754	0.0167173	0.0151976	0.0121581	0.0136778
MAS1	0.173252	0.167173	0.168693	0.167173	0.159574	0.155015	0.158055	0.164134	0.164134	0.164134	0.155015	0.161094	0.158055	0.161094	0.144377	0.153495	0.159574	0.155015	0.153495	0.164134	0.161094	0.153495	0.156535	0.155015	0.156535	0.158055	0.155015	0.156535	0.155015	0.156535	0.155015	0.159574	0.153495	0.158055	0.155015	0.156535	0.147416	0.144377	0.135258	0.139818	0.138298	0.139818	0.129179	0.129179	0.132219	0.136778	0.141337	0.136778	0.135258
MAS2	0.180851	0.174772	0.176292	0.174772	0.162614	0.158055	0.158055	0.167173	0.167173	0.167173	0.156535	0.165653	0.162614	0.165653	0.145897	0.155015	0.161094	0.159574	0.158055	0.165653	0.162614	0.156535	0.162614	0.161094	0.162614	0.164134	0.161094	0.162614	0.161094	0.162614	0.161094	0.165653	0.159574	0.164134	0.161094	0.162614	0.148936	0.147416	0.136778	0.141337	0.139818	0.141337	0.130699	0.130699	0.133739	0.141337	0.142857	0.138298	0.136778
MAS3	0.180851	0.174772	0.176292	0.174772	0.162614	0.158055	0.161094	0.170213	0.170213	0.170213	0.159574	0.164134	0.161094	0.164134	0.147416	0.156535	0.162614	0.156535	0.155015	0.162614	0.159574	0.156535	0.162614	0.161094	0.162614	0.164134	0.161094	0.162614	0.161094	0.162614	0.161094	0.165653	0.159574	0.164134	0.161094	0.162614	0.148936	0.144377	0.136778	0.141337	0.139818	0.141337	0.130699	0.130699	0.133739	0.138298	0.139818	0.138298	0.136778
MAS4	0.176292	0.170213	0.171733	0.170213	0.158055	0.156535	0.159574	0.168693	0.168693	0.168693	0.161094	0.164134	0.161094	0.164134	0.148936	0.153495	0.159574	0.159574	0.158055	0.162614	0.159574	0.151976	0.158055	0.156535	0.158055	0.159574	0.156535	0.158055	0.156535	0.158055	0.156535	0.161094	0.155015	0.159574	0.156535	0.158055	0.145897	0.144377	0.130699	0.135258	0.133739	0.135258	0.129179	0.129179	0.132219	0.133739	0.135258	0.133739	0.132219
AFE1**	0.177812	0.171733	0.174772	0.173252	0.148936	0.145897	0.153495	0.156535	0.158055	0.156535	0.158055	0.165653	0.162614	0.162614	0.161094	0.159574	0.159574	0.18845	0.18693	0.18693	0.18541	0.156535	0.162614	0.161094	0.162614	0.164134	0.162614	0.164134	0.162614	0.164134	0.161094	0.167173	0.164134	0.165653	0.162614	0.164134	0.136778	0.147416	0.12614	0.121581	0.1231	0.12462	0.132219	0.129179	0.132219	0.135258	0.135258	0.135258	0.133739
COB1	0.183891	0.177812	0.180851	0.179331	0.148936	0.145897	0.147416	0.155015	0.156535	0.155015	0.159574	0.156535	0.156535	0.156535	0.156535	0.148936	0.151976	0.18541	0.183891	0.18693	0.18541	0.158055	0.167173	0.165653	0.167173	0.165653	0.167173	0.168693	0.167173	0.165653	0.162614	0.168693	0.165653	0.167173	0.164134	0.165653	0.133739	0.145897	0.1231	0.121581	0.120061	0.121581	0.121581	0.121581	0.12462	0.12462	0.12462	0.12462	0.1231
CUN2	0.18541	0.179331	0.182371	0.180851	0.147416	0.144377	0.145897	0.156535	0.158055	0.156535	0.159574	0.151976	0.153495	0.150456	0.156535	0.150456	0.156535	0.182371	0.180851	0.183891	0.182371	0.162614	0.174772	0.173252	0.174772	0.173252	0.174772	0.176292	0.174772	0.173252	0.170213	0.176292	0.173252	0.174772	0.171733	0.173252	0.133739	0.147416	0.12766	0.1231	0.12462	0.12614	0.1231	0.1231	0.12614	0.1231	0.1231	0.1231	0.121581
CUN3	0.182371	0.176292	0.179331	0.177812	0.144377	0.141337	0.142857	0.153495	0.155015	0.153495	0.156535	0.151976	0.153495	0.150456	0.156535	0.150456	0.153495	0.182371	0.180851	0.183891	0.182371	0.161094	0.173252	0.171733	0.173252	0.171733	0.173252	0.174772	0.173252	0.171733	0.168693	0.174772	0.171733	0.173252	0.170213	0.171733	0.132219	0.145897	0.12462	0.120061	0.121581	0.1231	0.120061	0.120061	0.1231	0.1231	0.1231	0.1231	0.121581
CUN1	0.180851	0.174772	0.177812	0.176292	0.142857	0.139818	0.144377	0.155015	0.156535	0.155015	0.155015	0.150456	0.151976	0.148936	0.155015	0.148936	0.151976	0.180851	0.179331	0.182371	0.180851	0.159574	0.171733	0.170213	0.171733	0.170213	0.171733	0.173252	0.171733	0.170213	0.167173	0.173252	0.170213	0.171733	0.168693	0.170213	0.130699	0.144377	0.1231	0.118541	0.120061	0.121581	0.118541	0.118541	0.121581	0.121581	0.121581	0.121581	0.120061
ASY1	0.194529	0.18845	0.191489	0.18997	0.174772	0.171733	0.174772	0.177812	0.177812	0.177812	0.168693	0.171733	0.170213	0.170213	0.173252	0.173252	0.173252	0.182371	0.180851	0.180851	0.176292	0.162614	0.168693	0.167173	0.170213	0.170213	0.167173	0.168693	0.167173	0.170213	0.167173	0.171733	0.167173	0.171733	0.168693	0.170213	0.136778	0.142857	0.148936	0.144377	0.145897	0.145897	0.138298	0.138298	0.141337	0.135258	0.139818	0.141337	0.139818
ASY2	0.197568	0.191489	0.194529	0.193009	0.176292	0.173252	0.174772	0.177812	0.177812	0.177812	0.171733	0.171733	0.170213	0.170213	0.173252	0.170213	0.170213	0.18693	0.18541	0.18541	0.180851	0.161094	0.167173	0.165653	0.168693	0.168693	0.165653	0.167173	0.165653	0.168693	0.165653	0.170213	0.165653	0.170213	0.167173	0.168693	0.135258	0.144377	0.151976	0.150456	0.151976	0.151976	0.139818	0.139818	0.142857	0.139818	0.144377	0.145897	0.144377
APR1	0.194529	0.18693	0.18997	0.18845	0.170213	0.164134	0.168693	0.176292	0.177812	0.176292	0.167173	0.171733	0.167173	0.170213	0.177812	0.170213	0.173252	0.183891	0.182371	0.183891	0.182371	0.155015	0.164134	0.162614	0.164134	0.162614	0.164134	0.167173	0.165653	0.164134	0.161094	0.167173	0.164134	0.165653	0.162614	0.164134	0.12766	0.132219	0.139818	0.138298	0.141337	0.142857	0.130699	0.130699	0.133739	0.130699	0.12766	0.129179	0.12766
APR2	0.18997	0.182371	0.18541	0.183891	0.168693	0.162614	0.164134	0.171733	0.173252	0.171733	0.168693	0.168693	0.164134	0.167173	0.176292	0.167173	0.170213	0.183891	0.182371	0.183891	0.182371	0.155015	0.164134	0.162614	0.164134	0.162614	0.164134	0.167173	0.165653	0.164134	0.161094	0.167173	0.164134	0.165653	0.162614	0.164134	0.12766	0.135258	0.139818	0.138298	0.141337	0.142857	0.133739	0.133739	0.136778	0.130699	0.12766	0.129179	0.12766
APR3	0.18997	0.182371	0.18541	0.183891	0.170213	0.164134	0.165653	0.173252	0.174772	0.173252	0.168693	0.168693	0.164134	0.167173	0.176292	0.167173	0.170213	0.18541	0.183891	0.18541	0.183891	0.153495	0.162614	0.161094	0.162614	0.161094	0.162614	0.165653	0.164134	0.162614	0.159574	0.165653	0.162614	0.164134	0.161094	0.162614	0.129179	0.133739	0.138298	0.136778	0.139818	0.141337	0.132219	0.132219	0.135258	0.129179	0.12614	0.12766	0.12614
AFE2	0.18541	0.177812	0.179331	0.177812	0.161094	0.158055	0.158055	0.164134	0.165653	0.165653	0.151976	0.168693	0.167173	0.170213	0.170213	0.173252	0.171733	0.191489	0.18997	0.18997	0.18845	0.179331	0.191489	0.18997	0.191489	0.18997	0.18845	0.18845	0.18997	0.193009	0.18997	0.194529	0.193009	0.191489	0.191489	0.193009	0.144377	0.138298	0.145897	0.147416	0.147416	0.147416	0.145897	0.142857	0.148936	0.139818	0.142857	0.145897	0.144377
AFE3	0.182371	0.174772	0.176292	0.174772	0.161094	0.158055	0.156535	0.162614	0.164134	0.164134	0.151976	0.167173	0.165653	0.168693	0.168693	0.168693	0.167173	0.193009	0.191489	0.191489	0.18997	0.173252	0.182371	0.180851	0.182371	0.180851	0.179331	0.182371	0.180851	0.183891	0.180851	0.18541	0.183891	0.18541	0.182371	0.183891	0.138298	0.135258	0.142857	0.144377	0.144377	0.144377	0.144377	0.141337	0.147416	0.135258	0.138298	0.141337	0.139818
AFE4	0.176292	0.171733	0.173252	0.171733	0.155015	0.151976	0.150456	0.156535	0.158055	0.158055	0.145897	0.164134	0.162614	0.165653	0.165653	0.168693	0.167173	0.18693	0.18541	0.18541	0.183891	0.173252	0.18541	0.183891	0.18541	0.183891	0.182371	0.182371	0.183891	0.18693	0.183891	0.18845	0.18693	0.18541	0.18541	0.18693	0.139818	0.135258	0.142857	0.144377	0.144377	0.144377	0.144377	0.141337	0.147416	0.138298	0.141337	0.144377	0.142857
AFO1	0.18541	0.179331	0.180851	0.179331	0.158055	0.159574	0.156535	0.164134	0.162614	0.164134	0.156535	0.158055	0.162614	0.159574	0.182371	0.176292	0.180851	0.18997	0.18845	0.18845	0.18845	0.168693	0.173252	0.171733	0.173252	0.174772	0.170213	0.173252	0.171733	0.170213	0.170213	0.171733	0.167173	0.171733	0.168693	0.170213	0.138298	0.130699	0.139818	0.135258	0.136778	0.136778	0.135258	0.135258	0.138298	0.130699	0.132219	0.138298	0.136778
AFO2	0.18693	0.180851	0.182371	0.180851	0.155015	0.156535	0.155015	0.162614	0.161094	0.162614	0.156535	0.155015	0.159574	0.156535	0.180851	0.174772	0.179331	0.18845	0.18693	0.18693	0.18693	0.168693	0.173252	0.171733	0.173252	0.174772	0.170213	0.173252	0.171733	0.170213	0.170213	0.171733	0.167173	0.171733	0.168693	0.170213	0.136778	0.129179	0.136778	0.135258	0.136778	0.136778	0.132219	0.132219	0.135258	0.130699	0.132219	0.138298	0.136778
AFO3	0.18541	0.179331	0.180851	0.179331	0.153495	0.155015	0.153495	0.161094	0.159574	0.161094	0.155015	0.153495	0.158055	0.155015	0.179331	0.173252	0.177812	0.18845	0.18693	0.18693	0.18693	0.167173	0.171733	0.170213	0.171733	0.173252	0.168693	0.171733	0.170213	0.168693	0.168693	0.170213	0.165653	0.170213	0.167173	0.168693	0.135258	0.12766	0.135258	0.136778	0.138298	0.138298	0.130699	0.130699	0.133739	0.132219	0.133739	0.139818	0.138298
AAS1	0.179331	0.177812	0.177812	0.176292	0.158055	0.156535	0.151976	0.159574	0.158055	0.159574	0.150456	0.164134	0.162614	0.162614	0.182371	0.170213	0.174772	0.18693	0.18541	0.18845	0.18845	0.158055	0.168693	0.167173	0.168693	0.170213	0.165653	0.168693	0.167173	0.168693	0.168693	0.170213	0.165653	0.170213	0.167173	0.168693	0.130699	0.135258	0.138298	0.139818	0.141337	0.141337	0.135258	0.135258	0.138298	0.139818	0.144377	0.142857	0.141337
AAS2	0.174772	0.173252	0.173252	0.171733	0.158055	0.159574	0.155015	0.159574	0.161094	0.159574	0.156535	0.167173	0.162614	0.165653	0.180851	0.170213	0.174772	0.183891	0.182371	0.18541	0.18541	0.159574	0.170213	0.168693	0.170213	0.171733	0.167173	0.170213	0.168693	0.170213	0.170213	0.171733	0.167173	0.171733	0.168693	0.170213	0.139818	0.129179	0.136778	0.135258	0.136778	0.136778	0.139818	0.139818	0.142857	0.132219	0.136778	0.141337	0.139818
ARU2	0.212766	0.212766	0.214286	0.212766	0.221884	0.220365	0.217325	0.212766	0.215805	0.215805	0.208207	0.217325	0.218845	0.218845	0.206687	0.209726	0.211246	0.202128	0.200608	0.200608	0.199088	0.206687	0.215805	0.214286	0.217325	0.214286	0.214286	0.218845	0.217325	0.209726	0.208207	0.211246	0.206687	0.211246	0.208207	0.209726	0.18845	0.18693	0.18541	0.182371	0.18541	0.18693	0.179331	0.179331	0.182371	0.177812	0.173252	0.180851	0.182371
ARU3	0.215805	0.215805	0.217325	0.215805	0.220365	0.218845	0.215805	0.214286	0.217325	0.217325	0.208207	0.215805	0.217325	0.217325	0.208207	0.211246	0.212766	0.206687	0.205167	0.202128	0.200608	0.205167	0.214286	0.212766	0.215805	0.212766	0.212766	0.217325	0.215805	0.208207	0.206687	0.209726	0.208207	0.209726	0.206687	0.208207	0.183891	0.18541	0.180851	0.177812	0.180851	0.182371	0.177812	0.177812	0.183891	0.173252	0.168693	0.176292	0.177812
ARU4	0.214286	0.214286	0.215805	0.214286	0.221884	0.220365	0.217325	0.212766	0.215805	0.215805	0.209726	0.217325	0.218845	0.218845	0.209726	0.209726	0.211246	0.206687	0.205167	0.202128	0.200608	0.206687	0.215805	0.214286	0.217325	0.214286	0.214286	0.218845	0.217325	0.209726	0.208207	0.211246	0.209726	0.211246	0.208207	0.209726	0.18997	0.18845	0.18693	0.183891	0.18693	0.18845	0.180851	0.180851	0.183891	0.179331	0.174772	0.182371	0.183891
ARU5	0.215805	0.215805	0.217325	0.215805	0.223404	0.221884	0.218845	0.214286	0.217325	0.217325	0.211246	0.218845	0.220365	0.220365	0.211246	0.211246	0.212766	0.206687	0.205167	0.202128	0.200608	0.208207	0.217325	0.215805	0.218845	0.215805	0.215805	0.220365	0.218845	0.211246	0.209726	0.212766	0.211246	0.212766	0.209726	0.211246	0.18845	0.18997	0.18541	0.182371	0.18541	0.18693	0.182371	0.182371	0.18541	0.177812	0.173252	0.180851	0.182371
ARU32	0.214286	0.214286	0.215805	0.214286	0.218845	0.217325	0.206687	0.208207	0.211246	0.211246	0.202128	0.215805	0.217325	0.217325	0.211246	0.211246	0.209726	0.202128	0.200608	0.194529	0.194529	0.191489	0.199088	0.197568	0.200608	0.197568	0.197568	0.202128	0.200608	0.196049	0.194529	0.197568	0.196049	0.197568	0.194529	0.196049	0.179331	0.183891	0.18541	0.182371	0.18541	0.18693	0.177812	0.177812	0.183891	0.176292	0.174772	0.182371	0.180851
ARU31	0.217325	0.217325	0.218845	0.217325	0.215805	0.214286	0.203647	0.205167	0.205167	0.205167	0.199088	0.214286	0.218845	0.215805	0.209726	0.209726	0.214286	0.208207	0.206687	0.203647	0.202128	0.196049	0.200608	0.199088	0.202128	0.199088	0.199088	0.203647	0.202128	0.194529	0.193009	0.196049	0.194529	0.196049	0.193009	0.194529	0.176292	0.180851	0.177812	0.174772	0.177812	0.179331	0.173252	0.173252	0.176292	0.171733	0.167173	0.174772	0.173252
ARU33	0.211246	0.211246	0.212766	0.211246	0.215805	0.214286	0.208207	0.209726	0.212766	0.212766	0.199088	0.211246	0.212766	0.212766	0.206687	0.209726	0.208207	0.209726	0.208207	0.202128	0.200608	0.196049	0.202128	0.200608	0.203647	0.200608	0.200608	0.205167	0.203647	0.199088	0.197568	0.200608	0.199088	0.200608	0.197568	0.199088	0.182371	0.180851	0.182371	0.179331	0.182371	0.183891	0.173252	0.173252	0.179331	0.174772	0.170213	0.177812	0.176292
ARU34	0.217325	0.217325	0.218845	0.217325	0.218845	0.217325	0.206687	0.208207	0.211246	0.211246	0.203647	0.212766	0.214286	0.214286	0.209726	0.208207	0.206687	0.214286	0.212766	0.206687	0.203647	0.199088	0.206687	0.205167	0.208207	0.205167	0.205167	0.209726	0.208207	0.203647	0.202128	0.205167	0.203647	0.205167	0.202128	0.203647	0.182371	0.18541	0.18997	0.183891	0.18693	0.18845	0.179331	0.179331	0.18541	0.177812	0.173252	0.180851	0.179331
ARU35	0.218845	0.218845	0.220365	0.218845	0.220365	0.218845	0.208207	0.209726	0.212766	0.212766	0.205167	0.214286	0.215805	0.215805	0.212766	0.211246	0.209726	0.218845	0.217325	0.211246	0.208207	0.202128	0.209726	0.208207	0.211246	0.208207	0.208207	0.212766	0.211246	0.206687	0.205167	0.208207	0.206687	0.208207	0.205167	0.206687	0.18541	0.18541	0.193009	0.18693	0.18997	0.191489	0.182371	0.182371	0.18845	0.180851	0.176292	0.183891	0.182371
ARU19	0.220365	0.220365	0.221884	0.220365	0.221884	0.220365	0.211246	0.212766	0.215805	0.215805	0.205167	0.215805	0.217325	0.217325	0.211246	0.211246	0.209726	0.215805	0.214286	0.208207	0.205167	0.200608	0.206687	0.205167	0.208207	0.205167	0.206687	0.209726	0.208207	0.203647	0.202128	0.205167	0.203647	0.205167	0.202128	0.203647	0.180851	0.18541	0.18693	0.183891	0.18693	0.18845	0.177812	0.177812	0.183891	0.176292	0.171733	0.179331	0.177812
ARU6	0.217325	0.217325	0.218845	0.217325	0.220365	0.218845	0.212766	0.214286	0.217325	0.217325	0.205167	0.214286	0.215805	0.215805	0.212766	0.212766	0.211246	0.209726	0.208207	0.202128	0.199088	0.197568	0.205167	0.203647	0.206687	0.203647	0.205167	0.208207	0.206687	0.202128	0.200608	0.203647	0.202128	0.203647	0.200608	0.202128	0.182371	0.180851	0.18845	0.18541	0.18845	0.18997	0.173252	0.173252	0.179331	0.174772	0.170213	0.177812	0.176292
ARU13	0.217325	0.217325	0.218845	0.217325	0.218845	0.217325	0.211246	0.212766	0.215805	0.215805	0.202128	0.211246	0.212766	0.212766	0.206687	0.206687	0.205167	0.212766	0.211246	0.205167	0.202128	0.197568	0.200608	0.199088	0.202128	0.199088	0.200608	0.203647	0.202128	0.197568	0.196049	0.199088	0.197568	0.199088	0.196049	0.197568	0.183891	0.182371	0.18997	0.18693	0.18997	0.191489	0.174772	0.174772	0.180851	0.176292	0.171733	0.179331	0.177812
ARU12	0.214286	0.214286	0.215805	0.214286	0.215805	0.214286	0.208207	0.209726	0.212766	0.212766	0.199088	0.214286	0.215805	0.215805	0.209726	0.209726	0.208207	0.209726	0.208207	0.202128	0.199088	0.194529	0.200608	0.199088	0.202128	0.199088	0.200608	0.203647	0.202128	0.197568	0.196049	0.199088	0.197568	0.199088	0.196049	0.197568	0.180851	0.179331	0.18693	0.183891	0.18693	0.18845	0.174772	0.174772	0.180851	0.176292	0.171733	0.179331	0.177812
ARU18	0.215805	0.215805	0.217325	0.215805	0.217325	0.215805	0.209726	0.211246	0.214286	0.214286	0.200608	0.212766	0.214286	0.214286	0.208207	0.208207	0.206687	0.211246	0.209726	0.203647	0.200608	0.196049	0.202128	0.200608	0.203647	0.200608	0.202128	0.205167	0.203647	0.199088	0.197568	0.200608	0.199088	0.200608	0.197568	0.199088	0.182371	0.180851	0.18845	0.18541	0.18845	0.18997	0.173252	0.173252	0.179331	0.174772	0.170213	0.177812	0.176292
ARU11	0.218845	0.218845	0.220365	0.218845	0.220365	0.218845	0.212766	0.211246	0.211246	0.211246	0.203647	0.215805	0.217325	0.217325	0.208207	0.206687	0.208207	0.218845	0.217325	0.214286	0.211246	0.194529	0.203647	0.202128	0.205167	0.202128	0.203647	0.206687	0.205167	0.200608	0.199088	0.202128	0.200608	0.202128	0.199088	0.200608	0.180851	0.18845	0.191489	0.18845	0.191489	0.193009	0.177812	0.177812	0.180851	0.180851	0.176292	0.182371	0.180851
ARU36	0.223404	0.223404	0.224924	0.223404	0.223404	0.221884	0.214286	0.215805	0.218845	0.218845	0.206687	0.217325	0.218845	0.218845	0.212766	0.212766	0.211246	0.212766	0.211246	0.205167	0.202128	0.200608	0.205167	0.203647	0.206687	0.203647	0.203647	0.208207	0.206687	0.202128	0.200608	0.203647	0.202128	0.203647	0.200608	0.202128	0.18693	0.183891	0.18997	0.183891	0.18693	0.18845	0.180851	0.180851	0.18693	0.176292	0.171733	0.182371	0.180851
ARU7	0.218845	0.218845	0.220365	0.218845	0.221884	0.220365	0.214286	0.211246	0.214286	0.214286	0.206687	0.217325	0.218845	0.218845	0.211246	0.211246	0.209726	0.217325	0.215805	0.209726	0.206687	0.200608	0.209726	0.208207	0.211246	0.208207	0.209726	0.212766	0.211246	0.206687	0.205167	0.208207	0.206687	0.208207	0.205167	0.206687	0.182371	0.18845	0.18541	0.18541	0.18845	0.18997	0.173252	0.173252	0.179331	0.177812	0.173252	0.180851	0.179331
ARU24	0.220365	0.220365	0.221884	0.220365	0.218845	0.217325	0.211246	0.212766	0.212766	0.212766	0.203647	0.212766	0.214286	0.214286	0.208207	0.208207	0.209726	0.212766	0.211246	0.208207	0.205167	0.193009	0.202128	0.200608	0.203647	0.200608	0.202128	0.205167	0.203647	0.199088	0.197568	0.200608	0.199088	0.200608	0.197568	0.199088	0.179331	0.18541	0.183891	0.180851	0.183891	0.18541	0.171733	0.171733	0.177812	0.173252	0.168693	0.176292	0.174772
ARU8	0.223404	0.221884	0.223404	0.221884	0.220365	0.218845	0.212766	0.214286	0.214286	0.214286	0.203647	0.215805	0.217325	0.217325	0.208207	0.206687	0.212766	0.209726	0.208207	0.208207	0.205167	0.197568	0.206687	0.205167	0.208207	0.205167	0.206687	0.209726	0.208207	0.200608	0.199088	0.202128	0.200608	0.202128	0.199088	0.200608	0.176292	0.182371	0.180851	0.177812	0.180851	0.182371	0.171733	0.171733	0.177812	0.170213	0.165653	0.173252	0.171733
ARU37	0.214286	0.214286	0.215805	0.214286	0.220365	0.218845	0.211246	0.206687	0.209726	0.209726	0.202128	0.218845	0.220365	0.220365	0.208207	0.208207	0.206687	0.206687	0.205167	0.202128	0.199088	0.193009	0.200608	0.199088	0.202128	0.199088	0.199088	0.203647	0.202128	0.197568	0.196049	0.199088	0.197568	0.199088	0.196049	0.197568	0.179331	0.180851	0.183891	0.180851	0.183891	0.18541	0.173252	0.173252	0.176292	0.177812	0.173252	0.180851	0.179331
ARU9	0.218845	0.218845	0.220365	0.218845	0.218845	0.214286	0.205167	0.206687	0.206687	0.206687	0.199088	0.211246	0.212766	0.212766	0.206687	0.206687	0.208207	0.211246	0.209726	0.206687	0.203647	0.191489	0.197568	0.196049	0.199088	0.196049	0.197568	0.200608	0.199088	0.197568	0.196049	0.199088	0.197568	0.199088	0.196049	0.197568	0.176292	0.176292	0.180851	0.177812	0.180851	0.182371	0.173252	0.173252	0.179331	0.174772	0.170213	0.177812	0.176292
ARU39	0.217325	0.217325	0.218845	0.217325	0.221884	0.220365	0.212766	0.211246	0.214286	0.214286	0.203647	0.217325	0.218845	0.218845	0.211246	0.209726	0.208207	0.211246	0.209726	0.203647	0.200608	0.199088	0.203647	0.202128	0.205167	0.202128	0.202128	0.206687	0.205167	0.200608	0.199088	0.202128	0.200608	0.202128	0.199088	0.200608	0.18541	0.18541	0.18997	0.183891	0.18693	0.18845	0.179331	0.179331	0.182371	0.177812	0.173252	0.180851	0.179331
ARU38	0.218845	0.218845	0.220365	0.218845	0.223404	0.221884	0.214286	0.215805	0.218845	0.218845	0.206687	0.218845	0.220365	0.220365	0.211246	0.214286	0.212766	0.214286	0.212766	0.206687	0.203647	0.202128	0.206687	0.205167	0.208207	0.205167	0.205167	0.209726	0.208207	0.203647	0.202128	0.205167	0.203647	0.205167	0.202128	0.203647	0.18541	0.18693	0.18997	0.183891	0.18693	0.18845	0.179331	0.179331	0.18541	0.174772	0.170213	0.177812	0.176292
ARU40	0.218845	0.218845	0.220365	0.218845	0.220365	0.218845	0.211246	0.209726	0.212766	0.212766	0.203647	0.215805	0.217325	0.217325	0.208207	0.208207	0.208207	0.212766	0.211246	0.205167	0.202128	0.196049	0.203647	0.202128	0.205167	0.202128	0.203647	0.206687	0.205167	0.199088	0.197568	0.200608	0.199088	0.200608	0.197568	0.199088	0.180851	0.182371	0.18541	0.182371	0.18541	0.18693	0.171733	0.171733	0.177812	0.173252	0.168693	0.176292	0.174772
ARU16	0.218845	0.218845	0.220365	0.218845	0.217325	0.215805	0.208207	0.209726	0.209726	0.209726	0.200608	0.212766	0.214286	0.214286	0.205167	0.205167	0.206687	0.211246	0.209726	0.206687	0.203647	0.193009	0.200608	0.199088	0.202128	0.199088	0.200608	0.203647	0.202128	0.197568	0.196049	0.199088	0.197568	0.199088	0.196049	0.197568	0.176292	0.180851	0.180851	0.177812	0.180851	0.182371	0.170213	0.170213	0.176292	0.171733	0.167173	0.174772	0.173252
ARU41	0.218845	0.218845	0.220365	0.218845	0.220365	0.218845	0.211246	0.209726	0.212766	0.212766	0.203647	0.215805	0.217325	0.217325	0.208207	0.208207	0.206687	0.214286	0.212766	0.206687	0.203647	0.196049	0.203647	0.202128	0.205167	0.202128	0.203647	0.206687	0.205167	0.200608	0.199088	0.202128	0.200608	0.202128	0.199088	0.200608	0.179331	0.183891	0.183891	0.180851	0.183891	0.18541	0.173252	0.173252	0.179331	0.174772	0.170213	0.177812	0.176292
ARU43	0.218845	0.218845	0.220365	0.218845	0.220365	0.218845	0.211246	0.209726	0.212766	0.212766	0.205167	0.214286	0.215805	0.215805	0.209726	0.209726	0.208207	0.211246	0.209726	0.206687	0.203647	0.200608	0.205167	0.203647	0.206687	0.203647	0.203647	0.208207	0.206687	0.202128	0.200608	0.203647	0.202128	0.203647	0.200608	0.202128	0.183891	0.18541	0.18541	0.179331	0.182371	0.183891	0.173252	0.173252	0.179331	0.171733	0.170213	0.177812	0.176292
ARU42	0.221884	0.221884	0.223404	0.221884	0.224924	0.223404	0.215805	0.214286	0.217325	0.217325	0.205167	0.217325	0.218845	0.218845	0.212766	0.212766	0.211246	0.209726	0.208207	0.202128	0.199088	0.199088	0.208207	0.206687	0.209726	0.206687	0.206687	0.211246	0.209726	0.205167	0.203647	0.206687	0.205167	0.206687	0.203647	0.205167	0.177812	0.183891	0.183891	0.177812	0.180851	0.182371	0.173252	0.173252	0.179331	0.171733	0.167173	0.174772	0.173252
ARU29	0.221884	0.221884	0.223404	0.221884	0.223404	0.221884	0.214286	0.212766	0.215805	0.215805	0.206687	0.218845	0.220365	0.220365	0.211246	0.211246	0.209726	0.214286	0.212766	0.206687	0.203647	0.199088	0.206687	0.205167	0.208207	0.205167	0.205167	0.209726	0.208207	0.203647	0.202128	0.205167	0.203647	0.205167	0.202128	0.203647	0.179331	0.18693	0.183891	0.177812	0.180851	0.182371	0.176292	0.176292	0.182371	0.171733	0.167173	0.174772	0.173252
ARU17	0.221884	0.221884	0.223404	0.221884	0.220365	0.218845	0.211246	0.212766	0.215805	0.215805	0.203647	0.215805	0.220365	0.217325	0.211246	0.211246	0.209726	0.214286	0.212766	0.206687	0.203647	0.199088	0.206687	0.205167	0.208207	0.205167	0.205167	0.209726	0.208207	0.203647	0.202128	0.205167	0.203647	0.205167	0.202128	0.203647	0.179331	0.18693	0.18693	0.180851	0.183891	0.18541	0.173252	0.173252	0.179331	0.171733	0.167173	0.174772	0.173252
ARU1	0.220365	0.220365	0.221884	0.220365	0.221884	0.220365	0.212766	0.211246	0.214286	0.214286	0.205167	0.217325	0.218845	0.218845	0.209726	0.209726	0.208207	0.212766	0.211246	0.205167	0.202128	0.197568	0.205167	0.203647	0.206687	0.203647	0.203647	0.208207	0.206687	0.202128	0.200608	0.203647	0.202128	0.203647	0.200608	0.202128	0.180851	0.18541	0.18541	0.179331	0.182371	0.183891	0.174772	0.174772	0.180851	0.173252	0.168693	0.176292	0.174772
ARU20	0.218845	0.218845	0.220365	0.218845	0.220365	0.218845	0.212766	0.211246	0.211246	0.211246	0.203647	0.215805	0.215805	0.215805	0.208207	0.205167	0.209726	0.208207	0.206687	0.203647	0.200608	0.196049	0.205167	0.203647	0.206687	0.203647	0.205167	0.208207	0.206687	0.199088	0.197568	0.200608	0.199088	0.200608	0.197568	0.199088	0.177812	0.183891	0.18541	0.182371	0.18541	0.18693	0.173252	0.173252	0.176292	0.174772	0.170213	0.177812	0.176292
ARU15	0.215805	0.215805	0.217325	0.215805	0.214286	0.212766	0.206687	0.208207	0.208207	0.208207	0.197568	0.209726	0.211246	0.211246	0.202128	0.202128	0.203647	0.214286	0.212766	0.209726	0.206687	0.18997	0.199088	0.197568	0.200608	0.197568	0.199088	0.202128	0.200608	0.196049	0.194529	0.197568	0.196049	0.197568	0.194529	0.196049	0.176292	0.183891	0.18541	0.182371	0.18541	0.18693	0.173252	0.173252	0.179331	0.174772	0.170213	0.177812	0.176292
ARU10	0.220365	0.220365	0.221884	0.220365	0.217325	0.215805	0.209726	0.211246	0.211246	0.211246	0.200608	0.211246	0.212766	0.212766	0.203647	0.203647	0.205167	0.212766	0.211246	0.208207	0.205167	0.193009	0.202128	0.200608	0.203647	0.200608	0.202128	0.205167	0.203647	0.202128	0.200608	0.203647	0.202128	0.203647	0.200608	0.202128	0.177812	0.177812	0.182371	0.179331	0.182371	0.183891	0.171733	0.171733	0.177812	0.170213	0.165653	0.176292	0.174772
ASY4	0.217325	0.217325	0.218845	0.217325	0.217325	0.215805	0.208207	0.209726	0.209726	0.209726	0.200608	0.209726	0.211246	0.211246	0.203647	0.203647	0.208207	0.212766	0.211246	0.206687	0.203647	0.193009	0.202128	0.200608	0.203647	0.200608	0.202128	0.205167	0.203647	0.196049	0.194529	0.197568	0.196049	0.197568	0.194529	0.196049	0.174772	0.182371	0.183891	0.180851	0.183891	0.183891	0.171733	0.171733	0.177812	0.173252	0.168693	0.176292	0.174772
ARU25	0.218845	0.218845	0.220365	0.218845	0.218845	0.217325	0.211246	0.212766	0.212766	0.212766	0.202128	0.214286	0.215805	0.215805	0.206687	0.206687	0.209726	0.209726	0.208207	0.205167	0.202128	0.196049	0.205167	0.203647	0.206687	0.203647	0.205167	0.208207	0.206687	0.200608	0.199088	0.202128	0.200608	0.202128	0.199088	0.200608	0.176292	0.182371	0.183891	0.180851	0.183891	0.18541	0.171733	0.171733	0.177812	0.173252	0.168693	0.176292	0.174772
ARU26	0.218845	0.218845	0.220365	0.218845	0.218845	0.217325	0.211246	0.212766	0.212766	0.212766	0.202128	0.214286	0.215805	0.215805	0.206687	0.206687	0.208207	0.209726	0.208207	0.205167	0.202128	0.194529	0.203647	0.202128	0.205167	0.202128	0.203647	0.206687	0.205167	0.200608	0.199088	0.202128	0.200608	0.202128	0.199088	0.200608	0.176292	0.182371	0.183891	0.180851	0.183891	0.18541	0.171733	0.171733	0.177812	0.173252	0.168693	0.176292	0.174772
ARU30	0.221884	0.221884	0.223404	0.221884	0.220365	0.218845	0.209726	0.211246	0.211246	0.211246	0.203647	0.215805	0.217325	0.217325	0.208207	0.208207	0.209726	0.215805	0.214286	0.211246	0.208207	0.196049	0.205167	0.203647	0.206687	0.203647	0.205167	0.208207	0.206687	0.202128	0.200608	0.203647	0.202128	0.203647	0.200608	0.202128	0.180851	0.18541	0.18693	0.183891	0.18693	0.18845	0.173252	0.173252	0.179331	0.174772	0.170213	0.177812	0.176292
ARU28	0.221884	0.221884	0.223404	0.221884	0.220365	0.218845	0.212766	0.214286	0.214286	0.214286	0.202128	0.214286	0.215805	0.215805	0.206687	0.206687	0.208207	0.212766	0.211246	0.209726	0.206687	0.193009	0.202128	0.200608	0.203647	0.200608	0.202128	0.205167	0.203647	0.199088	0.197568	0.200608	0.199088	0.200608	0.197568	0.199088	0.177812	0.182371	0.183891	0.180851	0.183891	0.18541	0.171733	0.171733	0.177812	0.173252	0.168693	0.176292	0.174772
ARU23	0.221884	0.221884	0.223404	0.221884	0.220365	0.218845	0.212766	0.214286	0.214286	0.214286	0.203647	0.215805	0.217325	0.217325	0.208207	0.208207	0.209726	0.212766	0.211246	0.208207	0.205167	0.196049	0.205167	0.203647	0.206687	0.203647	0.205167	0.208207	0.206687	0.202128	0.200608	0.203647	0.202128	0.203647	0.200608	0.202128	0.176292	0.18541	0.183891	0.180851	0.180851	0.182371	0.174772	0.174772	0.180851	0.173252	0.168693	0.176292	0.174772
ARU22	0.218845	0.218845	0.220365	0.218845	0.218845	0.217325	0.211246	0.209726	0.209726	0.209726	0.203647	0.214286	0.215805	0.215805	0.208207	0.203647	0.205167	0.211246	0.209726	0.206687	0.203647	0.194529	0.203647	0.202128	0.205167	0.202128	0.203647	0.206687	0.205167	0.200608	0.199088	0.202128	0.200608	0.202128	0.199088	0.200608	0.179331	0.183891	0.18541	0.182371	0.18541	0.18693	0.173252	0.173252	0.176292	0.174772	0.170213	0.177812	0.176292
ARU21	0.221884	0.221884	0.223404	0.221884	0.220365	0.218845	0.212766	0.214286	0.214286	0.214286	0.205167	0.214286	0.215805	0.215805	0.209726	0.206687	0.208207	0.211246	0.209726	0.206687	0.203647	0.196049	0.205167	0.203647	0.206687	0.203647	0.205167	0.208207	0.206687	0.202128	0.200608	0.203647	0.202128	0.203647	0.200608	0.202128	0.179331	0.182371	0.183891	0.180851	0.183891	0.18541	0.171733	0.171733	0.177812	0.173252	0.168693	0.176292	0.174772
ARU14	0.221884	0.221884	0.223404	0.221884	0.217325	0.215805	0.209726	0.211246	0.211246	0.211246	0.203647	0.215805	0.217325	0.217325	0.205167	0.205167	0.206687	0.211246	0.209726	0.206687	0.206687	0.197568	0.206687	0.205167	0.208207	0.205167	0.206687	0.209726	0.208207	0.203647	0.202128	0.205167	0.203647	0.205167	0.202128	0.203647	0.180851	0.18693	0.18693	0.183891	0.18693	0.18845	0.176292	0.176292	0.182371	0.177812	0.173252	0.180851	0.179331
ASY3	0.220365	0.220365	0.221884	0.220365	0.218845	0.217325	0.211246	0.212766	0.212766	0.212766	0.202128	0.214286	0.215805	0.215805	0.206687	0.206687	0.208207	0.212766	0.211246	0.208207	0.205167	0.194529	0.203647	0.202128	0.205167	0.202128	0.203647	0.206687	0.205167	0.200608	0.199088	0.202128	0.200608	0.202128	0.199088	0.200608	0.177812	0.182371	0.183891	0.180851	0.183891	0.18541	0.171733	0.171733	0.177812	0.173252	0.168693	0.176292	0.174772
ARU27	0.220365	0.220365	0.221884	0.220365	0.218845	0.217325	0.211246	0.212766	0.212766	0.212766	0.202128	0.214286	0.215805	0.215805	0.206687	0.206687	0.208207	0.211246	0.209726	0.206687	0.203647	0.196049	0.205167	0.203647	0.206687	0.203647	0.205167	0.208207	0.206687	0.202128	0.200608	0.203647	0.202128	0.203647	0.200608	0.202128	0.177812	0.183891	0.18541	0.182371	0.18541	0.18693	0.173252	0.173252	0.179331	0.174772	0.170213	0.177812	0.176292
mean	0.148255
[truncated: 70 more columns]

## Sheet: Caption
Table. Estimates of Evolutionary Divergence between Sequences
The number of base differences per site from between sequences are shown. The analysis involved 119 nucleotide sequences. Codon positions included were 1st+2nd+3rd+Noncoding. All positions containing gaps and missing data were eliminated. There were a total of 658 positions in the final dataset. Evolutionary analyses were conducted in MEGA X [1].
1. Kumar S., Stecher G., Li M., Knyaz C., and Tamura K. (2018). MEGA X: Molecular Evolutionary Genetics Analysis across computing platforms. Molecular Biology and Evolution 35:1547-1549.
Disclaimer: Although utmost care has been taken to ensure the correctness of the caption, the caption text is provided "as is" without any warranty of any kind. Authors advise the user to carefully check the caption prior to its use for any purpose and report any errors or problems to the authors immediately (www.megasoftware.net). In no event shall the authors and their employers be liable for a…
